# Supplementary material for: Characterization of exosomal microRNAs in preterm infants fed with breast milk and infant formula
Source: Front Nutr. 2024 Jan 18;11:1339919. doi: 10.3389/fnut.2024.1339919 (PMC10830786; doi:10.3389/fnut.2024.1339919)
Supplement: SUPPLEMENTARY TABLE S3 — Functional enrichment analysis results from Metascape with the target gene list selected in S2. [file Table_3.XLSX]

## Sheet: Urine_Metascpae_p value
Table S3: Functional enrichment analysis results from Metascape with the target gene list selected in S2.
GroupID	Category	Term	Description	LogP	Log(q-value)	Genes	Symbols	InTerm_InList
1_Summary	WikiPathways	WP23	B cell receptor signaling pathway	-5.08351	-1.07924	998,1385,5608,9846,3084,4915,5435,4087,26523,26022,9798,494470,29934,84961,9570	CDC42,CREB1,MAP2K6,GAB2,NRG1,NTRK2,POLR2F,SMAD2,AGO1,TMEM98,IST1,ARK2C,SNX12,FBXL20,GOSR2	15/-
1_Member	WikiPathways	WP23	B cell receptor signaling pathway	-5.08351	-1.07924	998,1385,5608,9846	CDC42,CREB1,MAP2K6,GAB2	4/97
1_Member	WikiPathways	WP400	p38 MAPK signaling pathway	-4.86837	-1.07924	998,1385,5608	CDC42,CREB1,MAP2K6	3/35
1_Member	WikiPathways	WP585	Interferon type I signaling pathways	-4.2973	-0.717745	1385,5608,9846	CREB1,MAP2K6,GAB2	3/54
1_Member	WikiPathways	WP2018	RANKL/RANK signaling pathway	-4.27334	-0.717745	998,5608,9846	CDC42,MAP2K6,GAB2	3/55
1_Member	Reactome Gene Sets	R-HSA-9006934	Signaling by Receptor Tyrosine Kinases	-4.21806	-0.717745	998,1385,3084,4915,5435,9846	CDC42,CREB1,NRG1,NTRK2,POLR2F,GAB2	6/524
1_Member	WikiPathways	WP69	T-cell receptor signaling pathway	-3.63615	-0.362674	998,1385,9846	CDC42,CREB1,GAB2	3/90
1_Member	Reactome Gene Sets	R-HSA-5663202	Diseases of signal transduction by growth factor receptors and second messengers	-3.59575	-0.362674	1385,3084,4087,5435,9846	CREB1,NRG1,SMAD2,POLR2F,GAB2	5/433
1_Member	Reactome Gene Sets	R-HSA-2219528	PI3K/AKT Signaling in Cancer	-3.45135	-0.336383	1385,3084,9846	CREB1,NRG1,GAB2	3/104
1_Member	Reactome Gene Sets	R-HSA-1257604	PIP3 activates AKT signaling	-3.37108	-0.326699	1385,3084,9846,26523	CREB1,NRG1,GAB2,AGO1	4/268
1_Member	Reactome Gene Sets	R-HSA-9006925	Intracellular signaling by second messengers	-3.13412	-0.190372	1385,3084,9846,26523	CREB1,NRG1,GAB2,AGO1	4/310
1_Member	KEGG Pathway	hsa04380	Osteoclast differentiation	-3.12081	-0.190372	1385,5608,9846	CREB1,MAP2K6,GAB2	3/135
1_Member	GO Biological Processes	GO:0002573	myeloid leukocyte differentiation	-2.99688	-0.128588	998,1385,9846	CDC42,CREB1,GAB2	3/149
1_Member	WikiPathways	WP437	EGF/EGFR signaling pathway	-2.89233	-0.0783947	998,1385,9846	CDC42,CREB1,GAB2	3/162
1_Member	GO Biological Processes	GO:0002521	leukocyte differentiation	-2.64581	0	998,1385,9846,26022	CDC42,CREB1,GAB2,TMEM98	4/421
1_Member	GO Biological Processes	GO:0048667	cell morphogenesis involved in neuron differentiation	-2.58022	0	998,1385,9798,494470	CDC42,CREB1,IST1,ARK2C	4/439
1_Member	Reactome Gene Sets	R-HSA-449147	Signaling by Interleukins	-2.46415	0	998,1385,5608,9846	CDC42,CREB1,MAP2K6,GAB2	4/473
1_Member	GO Biological Processes	GO:0048812	neuron projection morphogenesis	-2.43499	0	998,1385,9798,494470	CDC42,CREB1,IST1,ARK2C	4/482
1_Member	GO Biological Processes	GO:0120039	plasma membrane bounded cell projection morphogenesis	-2.41906	0	998,1385,9798,494470	CDC42,CREB1,IST1,ARK2C	4/487
1_Member	GO Biological Processes	GO:0048858	cell projection morphogenesis	-2.40331	0	998,1385,9798,494470	CDC42,CREB1,IST1,ARK2C	4/492
1_Member	GO Biological Processes	GO:0032990	cell part morphogenesis	-2.34208	0	998,1385,9798,494470	CDC42,CREB1,IST1,ARK2C	4/512
1_Member	GO Biological Processes	GO:0045927	positive regulation of growth	-2.3303	0	998,1385,9798	CDC42,CREB1,IST1	3/256
1_Member	GO Biological Processes	GO:0060627	regulation of vesicle-mediated transport	-2.28925	0	998,9846,29934,84961	CDC42,GAB2,SNX12,FBXL20	4/530
1_Member	GO Biological Processes	GO:0030099	myeloid cell differentiation	-2.20139	0	998,1385,9846	CDC42,CREB1,GAB2	3/285
1_Member	GO Biological Processes	GO:1903532	positive regulation of secretion by cell	-2.18888	0	1385,5608,9846	CREB1,MAP2K6,GAB2	3/288
1_Member	GO Biological Processes	GO:0051047	positive regulation of secretion	-2.1013	0	1385,5608,9846	CREB1,MAP2K6,GAB2	3/310
1_Member	GO Biological Processes	GO:0032989	cellular component morphogenesis	-2.06739	0	998,1385,9798,494470	CDC42,CREB1,IST1,ARK2C	4/614
1_Member	GO Biological Processes	GO:0016050	vesicle organization	-2.00277	0	1385,9570,9798	CREB1,GOSR2,IST1	3/337
2_Summary	WikiPathways	WP3676	BDNF-TrkB signaling	-4.94661	-1.07924	1385,4915,9846,998,4087,3084,3340,5608	CREB1,NTRK2,GAB2,CDC42,SMAD2,NRG1,NDST1,MAP2K6	8/-
2_Member	WikiPathways	WP3676	BDNF-TrkB signaling	-4.94661	-1.07924	1385,4915,9846	CREB1,NTRK2,GAB2	3/33
2_Member	Canonical Pathways	M187	PID TRKR PATHWAY	-4.13842	-0.6961	998,4915,9846	CDC42,NTRK2,GAB2	3/61
2_Member	WikiPathways	WP4540	Hippo signaling regulation pathways	-3.52717	-0.336383	998,4087,4915	CDC42,SMAD2,NTRK2	3/98
2_Member	GO Biological Processes	GO:0043410	positive regulation of MAPK cascade	-3.41557	-0.326699	998,3084,3340,4915,5608	CDC42,NRG1,NDST1,NTRK2,MAP2K6	5/474
2_Member	WikiPathways	WP2380	Brain-derived neurotrophic factor (BDNF) signaling pathway	-3.03968	-0.141424	998,1385,4915	CDC42,CREB1,NTRK2	3/144
2_Member	GO Biological Processes	GO:0007167	enzyme-linked receptor protein signaling pathway	-2.90378	-0.0783947	3084,3340,4087,4915,9846	NRG1,NDST1,SMAD2,NTRK2,GAB2	5/616
2_Member	GO Biological Processes	GO:0043408	regulation of MAPK cascade	-2.73482	0	998,3084,3340,4915,5608	CDC42,NRG1,NDST1,NTRK2,MAP2K6	5/673
2_Member	WikiPathways	WP4223	Ras signaling	-2.73415	0	998,4915,9846	CDC42,NTRK2,GAB2	3/184
2_Member	GO Biological Processes	GO:0007169	transmembrane receptor protein tyrosine kinase signaling pathway	-2.66459	0	3084,3340,4915,9846	NRG1,NDST1,NTRK2,GAB2	4/416
2_Member	KEGG Pathway	hsa04014	Ras signaling pathway	-2.42883	0	998,4915,9846	CDC42,NTRK2,GAB2	3/236
2_Member	WikiPathways	WP382	MAPK signaling pathway	-2.37356	0	998,4915,5608	CDC42,NTRK2,MAP2K6	3/247
2_Member	KEGG Pathway	hsa04010	MAPK signaling pathway	-2.13627	0	998,4915,5608	CDC42,NTRK2,MAP2K6	3/301
3_Summary	GO Biological Processes	GO:0051046	regulation of secretion	-4.82259	-1.07924	1385,2029,3084,5608,9846,84961,133308,4087,387597	CREB1,ENSA,NRG1,MAP2K6,GAB2,FBXL20,SLC9B2,SMAD2,ILDR2	9/-
3_Member	GO Biological Processes	GO:0051046	regulation of secretion	-4.82259	-1.07924	1385,2029,3084,5608,9846,84961,133308	CREB1,ENSA,NRG1,MAP2K6,GAB2,FBXL20,SLC9B2	7/620
3_Member	GO Biological Processes	GO:1903530	regulation of secretion by cell	-4.02964	-0.68423	1385,2029,5608,9846,84961,133308	CREB1,ENSA,MAP2K6,GAB2,FBXL20,SLC9B2	6/567
3_Member	GO Biological Processes	GO:0010817	regulation of hormone levels	-3.16984	-0.190372	1385,2029,4087,133308,387597	CREB1,ENSA,SMAD2,SLC9B2,ILDR2	5/537
3_Member	GO Biological Processes	GO:0046883	regulation of hormone secretion	-2.35413	0	1385,2029,133308	CREB1,ENSA,SLC9B2	3/251
4_Summary	GO Biological Processes	GO:0009743	response to carbohydrate	-4.04985	-0.68423	4087,5608,26137,387597,1385,4915,3340,54464	SMAD2,MAP2K6,ZBTB20,ILDR2,CREB1,NTRK2,NDST1,XRN1	8/-
4_Member	GO Biological Processes	GO:0009743	response to carbohydrate	-4.04985	-0.68423	4087,5608,26137,387597	SMAD2,MAP2K6,ZBTB20,ILDR2	4/178
4_Member	GO Biological Processes	GO:0046879	hormone secretion	-3.59414	-0.362674	1385,4087,387597	CREB1,SMAD2,ILDR2	3/93
4_Member	GO Biological Processes	GO:0009914	hormone transport	-3.45135	-0.336383	1385,4087,387597	CREB1,SMAD2,ILDR2	3/104
4_Member	GO Biological Processes	GO:0009749	response to glucose	-3.06612	-0.152067	4087,26137,387597	SMAD2,ZBTB20,ILDR2	3/141
4_Member	GO Biological Processes	GO:0009746	response to hexose	-3.02237	-0.139359	4087,26137,387597	SMAD2,ZBTB20,ILDR2	3/146
4_Member	WikiPathways	WP4666	Hepatitis B infection	-2.98018	-0.126131	1385,4087,5608	CREB1,SMAD2,MAP2K6	3/151
4_Member	GO Biological Processes	GO:0034284	response to monosaccharide	-2.95557	-0.115305	4087,26137,387597	SMAD2,ZBTB20,ILDR2	3/154
4_Member	GO Biological Processes	GO:0042886	amide transport	-2.84703	-0.0456844	4087,4915,387597	SMAD2,NTRK2,ILDR2	3/168
4_Member	GO Biological Processes	GO:0023061	signal release	-2.71415	0	1385,4087,387597	CREB1,SMAD2,ILDR2	3/187
4_Member	GO Biological Processes	GO:0032940	secretion by cell	-2.67979	0	1385,4087,4915,387597	CREB1,SMAD2,NTRK2,ILDR2	4/412
4_Member	GO Biological Processes	GO:0140352	export from cell	-2.46415	0	1385,4087,4915,387597	CREB1,SMAD2,NTRK2,ILDR2	4/473
4_Member	GO Biological Processes	GO:0071363	cellular response to growth factor stimulus	-2.42223	0	1385,3340,4087,4915	CREB1,NDST1,SMAD2,NTRK2	4/486
4_Member	GO Biological Processes	GO:0097305	response to alcohol	-2.34453	0	1385,4087,54464	CREB1,SMAD2,XRN1	3/253
4_Member	GO Biological Processes	GO:0070848	response to growth factor	-2.32719	0	1385,3340,4087,4915	CREB1,NDST1,SMAD2,NTRK2	4/517
4_Member	GO Biological Processes	GO:0046903	secretion	-2.29502	0	1385,4087,4915,387597	CREB1,SMAD2,NTRK2,ILDR2	4/528
5_Summary	KEGG Pathway	hsa04144	Endocytosis	-3.48516	-0.336383	998,4087,9798,29934,3084,23040,3340,26523,1385	CDC42,SMAD2,IST1,SNX12,NRG1,MYT1L,NDST1,AGO1,CREB1	9/-
5_Member	KEGG Pathway	hsa04144	Endocytosis	-3.48516	-0.336383	998,4087,9798,29934	CDC42,SMAD2,IST1,SNX12	4/250
5_Member	GO Biological Processes	GO:0060485	mesenchyme development	-2.37848	0	998,3084,4087	CDC42,NRG1,SMAD2	3/246
5_Member	GO Biological Processes	GO:0045165	cell fate commitment	-2.33502	0	998,4087,23040	CDC42,SMAD2,MYT1L	3/255
5_Member	GO Biological Processes	GO:0003007	heart morphogenesis	-2.31159	0	998,3084,4087	CDC42,NRG1,SMAD2	3/260
5_Member	GO Biological Processes	GO:0007507	heart development	-2.18154	0	998,3084,3340,4087	CDC42,NRG1,NDST1,SMAD2	4/569
5_Member	Reactome Gene Sets	R-HSA-5683057	MAPK family signaling cascades	-2.04544	0	998,3084,26523	CDC42,NRG1,AGO1	3/325
5_Member	GO Biological Processes	GO:0030855	epithelial cell differentiation	-2.03859	0	998,1385,3084,4087	CDC42,CREB1,NRG1,SMAD2	4/626
6_Summary	GO Biological Processes	GO:0048511	rhythmic process	-3.3772	-0.326699	1385,1859,4915,5608,9798,133308,4287,84961	CREB1,DYRK1A,NTRK2,MAP2K6,IST1,SLC9B2,ATXN3,FBXL20	8/-
6_Member	GO Biological Processes	GO:0048511	rhythmic process	-3.3772	-0.326699	1385,1859,4915,5608	CREB1,DYRK1A,NTRK2,MAP2K6	4/267
6_Member	GO Biological Processes	GO:0007623	circadian rhythm	-3.12081	-0.190372	1385,1859,4915	CREB1,DYRK1A,NTRK2	3/135
6_Member	GO Biological Processes	GO:0010720	positive regulation of cell development	-2.56253	0	1385,4915,9798,133308	CREB1,NTRK2,IST1,SLC9B2	4/444
6_Member	GO Biological Processes	GO:0007610	behavior	-2.07469	0	1385,4287,4915,84961	CREB1,ATXN3,NTRK2,FBXL20	4/611
7_Summary	Reactome Gene Sets	R-HSA-2262752	Cellular responses to stress	-3.26154	-0.238347	1385,5608,6745,9570,26043,26523	CREB1,MAP2K6,SSR1,GOSR2,UBXN7,AGO1	6/-
7_Member	Reactome Gene Sets	R-HSA-2262752	Cellular responses to stress	-3.26154	-0.238347	1385,5608,6745,9570,26043,26523	CREB1,MAP2K6,SSR1,GOSR2,UBXN7,AGO1	6/788
8_Summary	GO Biological Processes	GO:0034660	ncRNA metabolic process	-3.19551	-0.192524	4087,5435,26523,54464,134637,1385,4915	SMAD2,POLR2F,AGO1,XRN1,ADAT2,CREB1,NTRK2	7/-
8_Member	GO Biological Processes	GO:0034660	ncRNA metabolic process	-3.19551	-0.192524	4087,5435,26523,54464,134637	SMAD2,POLR2F,AGO1,XRN1,ADAT2	5/530
8_Member	Reactome Gene Sets	R-HSA-8939211	ESR-mediated signaling	-2.50333	0	1385,5435,26523	CREB1,POLR2F,AGO1	3/222
8_Member	Reactome Gene Sets	R-HSA-9006931	Signaling by Nuclear Receptors	-2.14819	0	1385,5435,26523	CREB1,POLR2F,AGO1	3/298
8_Member	GO Biological Processes	GO:0034249	negative regulation of amide metabolic process	-2.00277	0	4915,26523,54464	NTRK2,AGO1,XRN1	3/337
9_Summary	GO Biological Processes	GO:0006897	endocytosis	-2.3361	0	998,4240,9910,133308	CDC42,MFGE8,RABGAP1L,SLC9B2	4/-
9_Member	GO Biological Processes	GO:0006897	endocytosis	-2.3361	0	998,4240,9910,133308	CDC42,MFGE8,RABGAP1L,SLC9B2	4/514
10_Summary	GO Biological Processes	GO:0051668	localization within membrane	-2.21104	0	6745,29934,55670,388336	SSR1,SNX12,PEX26,SHISA6	4/-
10_Member	GO Biological Processes	GO:0051668	localization within membrane	-2.21104	0	6745,29934,55670,388336	SSR1,SNX12,PEX26,SHISA6	4/558
11_Summary	GO Biological Processes	GO:0030162	regulation of proteolysis	-2.05772	0	4287,9798,26022,29934	ATXN3,IST1,TMEM98,SNX12	4/-
11_Member	GO Biological Processes	GO:0030162	regulation of proteolysis	-2.05772	0	4287,9798,26022,29934	ATXN3,IST1,TMEM98,SNX12	4/618

## Sheet: Serum_Metascape_p value
Table S3: Functional enrichment analysis results from Metascape with the target gene list selected in S2.
GroupID	Category	Term	Description	LogP	Log(q-value)	Genes	Symbols	InTerm_InList
1_Summary	Reactome Gene Sets	R-HSA-112316	Neuronal System	-5.55071	-1.20424	111,217,2904,2911,3084,3763,3845,4193,4916,673,3667,6752,4087	ADCY5,ALDH2,GRIN2B,GRM1,NRG1,KCNJ6,KRAS,MDM2,NTRK3,BRAF,IRS1,SSTR2,SMAD2	13/-
1_Member	Reactome Gene Sets	R-HSA-112316	Neuronal System	-5.55071	-1.20424	111,217,2904,2911,3084,3763,3845,4193,4916	ADCY5,ALDH2,GRIN2B,GRM1,NRG1,KCNJ6,KRAS,MDM2,NTRK3	9/410
1_Member	Reactome Gene Sets	R-HSA-112315	Transmission across Chemical Synapses	-4.88193	-0.970957	111,217,2904,3084,3763,3845,4193	ADCY5,ALDH2,GRIN2B,NRG1,KCNJ6,KRAS,MDM2	7/270
1_Member	Reactome Gene Sets	R-HSA-112314	Neurotransmitter receptors and postsynaptic signal transmission	-4.54492	-0.970957	111,2904,3084,3763,3845,4193	ADCY5,GRIN2B,NRG1,KCNJ6,KRAS,MDM2	6/205
1_Member	KEGG Pathway	hsa04726	Serotonergic synapse	-3.46388	-0.621296	111,673,3763,3845	ADCY5,BRAF,KCNJ6,KRAS	4/115
1_Member	KEGG Pathway	hsa04935	Growth hormone synthesis, secretion and action	-3.39371	-0.621296	111,3667,3845,6752	ADCY5,IRS1,KRAS,SSTR2	4/120
1_Member	KEGG Pathway	hsa04915	Estrogen signaling pathway	-3.17687	-0.476309	111,2911,3763,3845	ADCY5,GRM1,KCNJ6,KRAS	4/137
1_Member	KEGG Pathway	hsa04213	Longevity regulating pathway - multiple species	-3.13709	-0.47174	111,3667,3845	ADCY5,IRS1,KRAS	3/61
1_Member	KEGG Pathway	hsa04540	Gap junction	-2.67713	-0.261148	111,2911,3845	ADCY5,GRM1,KRAS	3/88
1_Member	KEGG Pathway	hsa04211	Longevity regulating pathway	-2.66314	-0.261148	111,3667,3845	ADCY5,IRS1,KRAS	3/89
1_Member	KEGG Pathway	hsa04713	Circadian entrainment	-2.55692	-0.225342	111,2904,3763	ADCY5,GRIN2B,KCNJ6	3/97
1_Member	KEGG Pathway	hsa04725	Cholinergic synapse	-2.37035	-0.106945	111,3763,3845	ADCY5,KCNJ6,KRAS	3/113
1_Member	KEGG Pathway	hsa04724	Glutamatergic synapse	-2.34908	-0.0960287	111,2904,2911	ADCY5,GRIN2B,GRM1	3/115
1_Member	GO Biological Processes	GO:0097305	response to alcohol	-2.21149	-0.0344249	111,2904,4087,4193	ADCY5,GRIN2B,SMAD2,MDM2	4/253
1_Member	KEGG Pathway	hsa04728	Dopaminergic synapse	-2.18312	-0.0156261	111,2904,3763	ADCY5,GRIN2B,KCNJ6	3/132
1_Member	KEGG Pathway	hsa04072	Phospholipase D signaling pathway	-2.04721	0	111,2911,3845	ADCY5,GRM1,KRAS	3/148
1_Member	KEGG Pathway	hsa04723	Retrograde endocannabinoid signaling	-2.04721	0	111,2911,3763	ADCY5,GRM1,KCNJ6	3/148
1_Member	KEGG Pathway	hsa04921	Oxytocin signaling pathway	-2.00041	0	111,3763,3845	ADCY5,KCNJ6,KRAS	3/154
2_Summary	Reactome Gene Sets	R-HSA-9034015	Signaling by NTRK3 (TRKC)	-4.82116	-0.970957	3667,3845,4916,673,2911,4067,3084,4087,4193,7170,2904,5966,4771,4774,111,26523,1497,846,123041,204851,6752,753,9043,9619,10443,9686,6792,84333	IRS1,KRAS,NTRK3,BRAF,GRM1,LYN,NRG1,SMAD2,MDM2,TPM3,GRIN2B,REL,NF2,NFIA,ADCY5,AGO1,CTNS,CASR,SLC24A4,HIPK1,SSTR2,LDLRAD4,SPAG9,ABCG1,N4BP2L2,VGLL4,CDKL5,PCGF5	28/-
2_Member	Reactome Gene Sets	R-HSA-9034015	Signaling by NTRK3 (TRKC)	-4.82116	-0.970957	3667,3845,4916	IRS1,KRAS,NTRK3	3/17
2_Member	KEGG Pathway	hsa04730	Long-term depression	-4.56336	-0.970957	673,2911,3845,4067	BRAF,GRM1,KRAS,LYN	4/60
2_Member	Reactome Gene Sets	R-HSA-5663202	Diseases of signal transduction by growth factor receptors and second messengers	-4.44947	-0.970957	673,3084,3667,3845,4067,4087,4193,7170	BRAF,NRG1,IRS1,KRAS,LYN,SMAD2,MDM2,TPM3	8/433
2_Member	KEGG Pathway	hsa04068	FoxO signaling pathway	-4.41018	-0.970957	673,2911,3667,3845,4193	BRAF,GRM1,IRS1,KRAS,MDM2	5/131
2_Member	KEGG Pathway	hsa04720	Long-term potentiation	-4.3736	-0.970957	673,2904,2911,3845	BRAF,GRIN2B,GRM1,KRAS	4/67
2_Member	Reactome Gene Sets	R-HSA-166520	Signaling by NTRKs	-4.36319	-0.970957	673,2904,3667,3845,4916	BRAF,GRIN2B,IRS1,KRAS,NTRK3	5/134
2_Member	WikiPathways	WP4216	Chromosomal and microsatellite instability in colorectal cancer	-4.22699	-0.915716	673,3845,4087,5966	BRAF,KRAS,SMAD2,REL	4/73
2_Member	GO Biological Processes	GO:0014009	glial cell proliferation	-4.14824	-0.915716	3845,4771,4774	KRAS,NF2,NFIA	3/28
2_Member	WikiPathways	WP2261	Glioblastoma signaling pathways	-4.00902	-0.838639	673,3667,3845,4193	BRAF,IRS1,KRAS,MDM2	4/83
2_Member	WikiPathways	WP673	ErbB signaling pathway	-3.83555	-0.735834	673,3084,3845,4193	BRAF,NRG1,KRAS,MDM2	4/92
2_Member	KEGG Pathway	hsa05216	Thyroid cancer	-3.78127	-0.735834	673,3845,7170	BRAF,KRAS,TPM3	3/37
2_Member	KEGG Pathway	hsa01522	Endocrine resistance	-3.7297	-0.725655	111,673,3845,4193	ADCY5,BRAF,KRAS,MDM2	4/98
2_Member	WikiPathways	WP2828	Bladder cancer	-3.67964	-0.699009	673,3845,4193	BRAF,KRAS,MDM2	3/40
2_Member	GO Biological Processes	GO:0060251	regulation of glial cell proliferation	-3.64754	-0.699009	3845,4067,4771	KRAS,LYN,NF2	3/41
2_Member	KEGG Pathway	hsa05219	Bladder cancer	-3.64754	-0.699009	673,3845,4193	BRAF,KRAS,MDM2	3/41
2_Member	WikiPathways	WP4535	Envelope proteins and their potential roles in EDMD physiopathology	-3.49852	-0.621296	111,3845,4087	ADCY5,KRAS,SMAD2	3/46
2_Member	Reactome Gene Sets	R-HSA-5683057	MAPK family signaling cascades	-3.45109	-0.621296	673,2904,3084,3667,3845,26523	BRAF,GRIN2B,NRG1,IRS1,KRAS,AGO1	6/325
2_Member	GO Biological Processes	GO:0008542	visual learning	-3.44365	-0.621296	673,1497,3845	BRAF,CTNS,KRAS	3/48
2_Member	GO Biological Processes	GO:0007610	behavior	-3.42387	-0.621296	111,673,846,1497,2904,2911,3845,123041	ADCY5,BRAF,CASR,CTNS,GRIN2B,GRM1,KRAS,SLC24A4	8/611
2_Member	KEGG Pathway	hsa04722	Neurotrophin signaling pathway	-3.40749	-0.621296	673,3667,3845,4916	BRAF,IRS1,KRAS,NTRK3	4/119
2_Member	WikiPathways	WP4549	Fragile X syndrome	-3.36653	-0.621296	673,2904,2911,3845	BRAF,GRIN2B,GRM1,KRAS	4/122
2_Member	WikiPathways	WP4539	Synaptic signaling pathways associated with autism spectrum disorder	-3.36571	-0.621296	2904,2911,3845	GRIN2B,GRM1,KRAS	3/51
2_Member	GO Biological Processes	GO:0007632	visual behavior	-3.24599	-0.512305	673,1497,3845	BRAF,CTNS,KRAS	3/56
2_Member	Canonical Pathways	M100	PID SHP2 PATHWAY	-3.22341	-0.500188	3667,3845,4916	IRS1,KRAS,NTRK3	3/57
2_Member	Reactome Gene Sets	R-HSA-9006934	Signaling by Receptor Tyrosine Kinases	-3.1036	-0.448472	673,2904,3084,3667,3845,4067,4916	BRAF,GRIN2B,NRG1,IRS1,KRAS,LYN,NTRK3	7/524
2_Member	WikiPathways	WP4685	Melanoma	-2.99958	-0.360682	673,3845,4193	BRAF,KRAS,MDM2	3/68
2_Member	Canonical Pathways	M121	PID MTOR 4PATHWAY	-2.98117	-0.35898	673,3667,3845	BRAF,IRS1,KRAS	3/69
2_Member	KEGG Pathway	hsa04218	Cellular senescence	-2.96683	-0.352753	3845,4087,4193,204851	KRAS,SMAD2,MDM2,HIPK1	4/156
2_Member	KEGG Pathway	hsa05218	Melanoma	-2.92761	-0.321501	673,3845,4193	BRAF,KRAS,MDM2	3/72
2_Member	Reactome Gene Sets	R-HSA-5673001	RAF/MAP kinase cascade	-2.88773	-0.319487	673,2904,3084,3667,3845	BRAF,GRIN2B,NRG1,IRS1,KRAS	5/280
2_Member	KEGG Pathway	hsa05214	Glioma	-2.87637	-0.319487	673,3845,4193	BRAF,KRAS,MDM2	3/75
2_Member	WikiPathways	WP3929	Chemokine signaling pathway	-2.8673	-0.319487	111,673,3845,4067	ADCY5,BRAF,KRAS,LYN	4/166
2_Member	KEGG Pathway	hsa05212	Pancreatic cancer	-2.85978	-0.319487	673,3845,4087	BRAF,KRAS,SMAD2	3/76
2_Member	KEGG Pathway	hsa05220	Chronic myeloid leukemia	-2.85978	-0.319487	673,3845,4193	BRAF,KRAS,MDM2	3/76
2_Member	Reactome Gene Sets	R-HSA-5684996	MAPK1/MAPK3 signaling	-2.84718	-0.313622	673,2904,3084,3667,3845	BRAF,GRIN2B,NRG1,IRS1,KRAS	5/286
2_Member	KEGG Pathway	hsa01521	EGFR tyrosine kinase inhibitor resistance	-2.81136	-0.299196	673,3084,3845	BRAF,NRG1,KRAS	3/79
2_Member	WikiPathways	WP4806	EGFR tyrosine kinase inhibitor resistance	-2.73488	-0.262265	673,3084,3845	BRAF,NRG1,KRAS	3/84
2_Member	GO Biological Processes	GO:0008306	associative learning	-2.72017	-0.262265	673,1497,3845	BRAF,CTNS,KRAS	3/85
2_Member	KEGG Pathway	hsa04012	ErbB signaling pathway	-2.72017	-0.262265	673,3084,3845	BRAF,NRG1,KRAS	3/85
2_Member	KEGG Pathway	hsa05210	Colorectal cancer	-2.70565	-0.262265	673,3845,4087	BRAF,KRAS,SMAD2	3/86
2_Member	GO Biological Processes	GO:0009416	response to light stimulus	-2.68214	-0.261148	673,1497,3845,4193,123041	BRAF,CTNS,KRAS,MDM2,SLC24A4	5/312
2_Member	KEGG Pathway	hsa05034	Alcoholism	-2.66995	-0.261148	111,673,2904,3845	ADCY5,BRAF,GRIN2B,KRAS	4/188
2_Member	WikiPathways	WP4263	Pancreatic adenocarcinoma pathway	-2.66314	-0.261148	673,3845,4087	BRAF,KRAS,SMAD2	3/89
2_Member	KEGG Pathway	hsa04062	Chemokine signaling pathway	-2.63685	-0.239768	111,673,3845,4067	ADCY5,BRAF,KRAS,LYN	4/192
2_Member	WikiPathways	WP23	B cell receptor signaling pathway	-2.55692	-0.225342	673,4067,5966	BRAF,LYN,REL	3/97
2_Member	KEGG Pathway	hsa05215	Prostate cancer	-2.55692	-0.225342	673,3845,4193	BRAF,KRAS,MDM2	3/97
2_Member	KEGG Pathway	hsa05203	Viral carcinogenesis	-2.542	-0.225342	3845,4067,4193,5966	KRAS,LYN,MDM2,REL	4/204
2_Member	GO Biological Processes	GO:0000165	MAPK cascade	-2.53439	-0.225342	673,846,3845,4771	BRAF,CASR,KRAS,NF2	4/205
2_Member	KEGG Pathway	hsa05205	Proteoglycans in cancer	-2.53439	-0.225342	673,3845,4087,4193	BRAF,KRAS,SMAD2,MDM2	4/205
2_Member	KEGG Pathway	hsa04015	Rap1 signaling pathway	-2.49691	-0.194083	111,673,2904,3845	ADCY5,BRAF,GRIN2B,KRAS	4/210
2_Member	KEGG Pathway	hsa04914	Progesterone-mediated oocyte maturation	-2.49523	-0.194083	111,673,3845	ADCY5,BRAF,KRAS	3/102
2_Member	KEGG Pathway	hsa04928	Parathyroid hormone synthesis, secretion and action	-2.4482	-0.162424	111,673,846	ADCY5,BRAF,CASR	3/106
2_Member	GO Biological Processes	GO:0014013	regulation of gliogenesis	-2.40305	-0.124769	3845,4067,4771	KRAS,LYN,NF2	3/110
2_Member	WikiPathways	WP710	DNA damage response (only ATM dependent)	-2.39205	-0.11938	3667,3845,4193	IRS1,KRAS,MDM2	3/111
2_Member	KEGG Pathway	hsa04024	cAMP signaling pathway	-2.3903	-0.11938	111,673,2904,6752	ADCY5,BRAF,GRIN2B,SSTR2	4/225
2_Member	Reactome Gene Sets	R-HSA-983705	Signaling by the B Cell Receptor (BCR)	-2.38115	-0.113859	3845,4067,5966	KRAS,LYN,REL	3/112
2_Member	KEGG Pathway	hsa05200	Pathways in cancer	-2.36706	-0.106945	111,673,3845,4087,4193,7170	ADCY5,BRAF,KRAS,SMAD2,MDM2,TPM3	6/531
2_Member	Reactome Gene Sets	R-HSA-187037	Signaling by NTRK1 (TRKA)	-2.34908	-0.0960287	673,3667,3845	BRAF,IRS1,KRAS	3/115
2_Member	GO Biological Processes	GO:0045596	negative regulation of cell differentiation	-2.31509	-0.082562	753,3845,4067,4771,9043,9619,10443	LDLRAD4,KRAS,LYN,NF2,SPAG9,ABCG1,N4BP2L2	7/724
2_Member	WikiPathways	WP4541	Hippo-Merlin signaling dysregulation	-2.2876	-0.0649768	3845,4771,9686	KRAS,NF2,VGLL4	3/121
2_Member	GO Biological Processes	GO:0050769	positive regulation of neurogenesis	-2.27889	-0.0603729	673,3845,4067,6792	BRAF,KRAS,LYN,CDKL5	4/242
2_Member	GO Biological Processes	GO:0050767	regulation of neurogenesis	-2.27012	-0.0603729	673,3845,4067,4771,6792	BRAF,KRAS,LYN,NF2,CDKL5	5/390
2_Member	Canonical Pathways	M186	PID PDGFRB PATHWAY	-2.21063	-0.0344249	673,3845,4067	BRAF,KRAS,LYN	3/129
2_Member	KEGG Pathway	hsa04926	Relaxin signaling pathway	-2.21063	-0.0344249	111,3845,4087	ADCY5,KRAS,SMAD2	3/129
2_Member	GO Biological Processes	GO:0035270	endocrine system development	-2.19221	-0.0189294	673,1497,4087	BRAF,CTNS,SMAD2	3/131
2_Member	WikiPathways	WP5124	Alzheimer's disease	-2.15311	0	673,2904,3667,3845	BRAF,GRIN2B,IRS1,KRAS	4/263
2_Member	GO Biological Processes	GO:0042063	gliogenesis	-2.14742	0	3845,4067,4771,4774	KRAS,LYN,NF2,NFIA	4/264
2_Member	KEGG Pathway	hsa04910	Insulin signaling pathway	-2.13876	0	673,3667,3845	BRAF,IRS1,KRAS	3/137
2_Member	GO Biological Processes	GO:0009314	response to radiation	-2.13307	0	673,1497,3845,4193,123041	BRAF,CTNS,KRAS,MDM2,SLC24A4	5/421
2_Member	KEGG Pathway	hsa04371	Apelin signaling pathway	-2.12152	0	111,3845,4087	ADCY5,KRAS,SMAD2	3/139
2_Member	GO Biological Processes	GO:0007611	learning or memory	-2.09181	0	673,1497,2904,3845	BRAF,CTNS,GRIN2B,KRAS	4/274
2_Member	KEGG Pathway	hsa04550	Signaling pathways regulating pluripotency of stem cells	-2.08785	0	3845,4087,84333	KRAS,SMAD2,PCGF5	3/143
2_Member	KEGG Pathway	hsa05226	Gastric cancer	-2.03926	0	673,3845,4087	BRAF,KRAS,SMAD2	3/149
2_Member	GO Biological Processes	GO:0007612	learning	-2.03137	0	673,1497,3845	BRAF,CTNS,KRAS	3/150
2_Member	WikiPathways	WP4666	Hepatitis B infection	-2.02355	0	673,3845,4087	BRAF,KRAS,SMAD2	3/151
2_Member	GO Biological Processes	GO:0051962	positive regulation of nervous system development	-2.00763	0	673,3845,4067,6792	BRAF,KRAS,LYN,CDKL5	4/290
3_Summary	Canonical Pathways	M33	PID GLYPICAN 1PATHWAY	-4.19656	-0.915716	3084,4067,4087,846,26137	NRG1,LYN,SMAD2,CASR,ZBTB20	5/-
3_Member	Canonical Pathways	M33	PID GLYPICAN 1PATHWAY	-4.19656	-0.915716	3084,4067,4087	NRG1,LYN,SMAD2	3/27
3_Member	GO Biological Processes	GO:0009743	response to carbohydrate	-2.75628	-0.273134	846,4067,4087,26137	CASR,LYN,SMAD2,ZBTB20	4/178
3_Member	GO Biological Processes	GO:0009749	response to glucose	-2.10455	0	846,4087,26137	CASR,SMAD2,ZBTB20	3/141
3_Member	GO Biological Processes	GO:0009746	response to hexose	-2.06328	0	846,4087,26137	CASR,SMAD2,ZBTB20	3/146
3_Member	GO Biological Processes	GO:0034284	response to monosaccharide	-2.00041	0	846,4087,26137	CASR,SMAD2,ZBTB20	3/154
4_Summary	GO Biological Processes	GO:0007193	adenylate cyclase-inhibiting G protein-coupled receptor signaling pathway	-4.18095	-0.915716	111,846,2911,6752,64582	ADCY5,CASR,GRM1,SSTR2,GPR135	5/-
4_Member	GO Biological Processes	GO:0007193	adenylate cyclase-inhibiting G protein-coupled receptor signaling pathway	-4.18095	-0.915716	111,846,2911,6752	ADCY5,CASR,GRM1,SSTR2	4/75
4_Member	WikiPathways	WP117	GPCRs, other	-2.60879	-0.23504	2911,6752,64582	GRM1,SSTR2,GPR135	3/93
4_Member	GO Biological Processes	GO:0007188	adenylate cyclase-modulating G protein-coupled receptor signaling pathway	-2.34329	-0.0937322	111,846,2911,6752	ADCY5,CASR,GRM1,SSTR2	4/232
5_Summary	GO Biological Processes	GO:0002088	lens development in camera-type eye	-4.05029	-0.849951	1497,4771,128637,204851,4193,9695,4774	CTNS,NF2,TBC1D20,HIPK1,MDM2,EDEM1,NFIA	7/-
5_Member	GO Biological Processes	GO:0002088	lens development in camera-type eye	-4.05029	-0.849951	1497,4771,128637,204851	CTNS,NF2,TBC1D20,HIPK1	4/81
5_Member	GO Biological Processes	GO:0032388	positive regulation of intracellular transport	-2.56511	-0.225342	4193,4771,9695,128637	MDM2,NF2,EDEM1,TBC1D20	4/201
5_Member	GO Biological Processes	GO:0043010	camera-type eye development	-2.56012	-0.225342	1497,4771,4774,128637,204851	CTNS,NF2,NFIA,TBC1D20,HIPK1	5/333
5_Member	GO Biological Processes	GO:0001654	eye development	-2.32197	-0.0856657	1497,4771,4774,128637,204851	CTNS,NF2,NFIA,TBC1D20,HIPK1	5/379
5_Member	GO Biological Processes	GO:0150063	visual system development	-2.30291	-0.0763478	1497,4771,4774,128637,204851	CTNS,NF2,NFIA,TBC1D20,HIPK1	5/383
5_Member	GO Biological Processes	GO:0048880	sensory system development	-2.27476	-0.0603729	1497,4771,4774,128637,204851	CTNS,NF2,NFIA,TBC1D20,HIPK1	5/389
6_Summary	GO Biological Processes	GO:0043408	regulation of MAPK cascade	-3.86403	-0.735834	673,846,2911,3084,4067,4771,4916,9043,10251,4087,4193,4774,10795	BRAF,CASR,GRM1,NRG1,LYN,NF2,NTRK3,SPAG9,SPRY3,SMAD2,MDM2,NFIA,ZNF268	13/-
6_Member	GO Biological Processes	GO:0043408	regulation of MAPK cascade	-3.86403	-0.735834	673,846,2911,3084,4067,4771,4916,9043,10251	BRAF,CASR,GRM1,NRG1,LYN,NF2,NTRK3,SPAG9,SPRY3	9/673
6_Member	GO Biological Processes	GO:0070372	regulation of ERK1 and ERK2 cascade	-2.67611	-0.261148	673,846,3084,4067,10251	BRAF,CASR,NRG1,LYN,SPRY3	5/313
6_Member	GO Biological Processes	GO:0043410	positive regulation of MAPK cascade	-2.60838	-0.23504	673,846,2911,3084,4916,9043	BRAF,CASR,GRM1,NRG1,NTRK3,SPAG9	6/474
6_Member	GO Biological Processes	GO:0071363	cellular response to growth factor stimulus	-2.5547	-0.225342	673,846,4087,4193,4774,4916	BRAF,CASR,SMAD2,MDM2,NFIA,NTRK3	6/486
6_Member	GO Biological Processes	GO:0070848	response to growth factor	-2.42326	-0.141243	673,846,4087,4193,4774,4916	BRAF,CASR,SMAD2,MDM2,NFIA,NTRK3	6/517
6_Member	GO Biological Processes	GO:0040017	positive regulation of locomotion	-2.06837	0	846,4067,4193,4916,9043,10795	CASR,LYN,MDM2,NTRK3,SPAG9,ZNF268	6/614
7_Summary	GO Biological Processes	GO:0070201	regulation of establishment of protein localization	-3.81732	-0.735834	111,846,3667,4193,7468,9619,9695,252983,1497,4067,4087,389434,673,123041,3084,4774,4916,2904,3763,57520,6752	ADCY5,CASR,IRS1,MDM2,NSD2,ABCG1,EDEM1,STXBP4,CTNS,LYN,SMAD2,IYD,BRAF,SLC24A4,NRG1,NFIA,NTRK3,GRIN2B,KCNJ6,HECW2,SSTR2	21/-
7_Member	GO Biological Processes	GO:0070201	regulation of establishment of protein localization	-3.81732	-0.735834	111,846,3667,4193,7468,9619,9695,252983	ADCY5,CASR,IRS1,MDM2,NSD2,ABCG1,EDEM1,STXBP4	8/534
7_Member	GO Biological Processes	GO:0010817	regulation of hormone levels	-3.80075	-0.735834	111,846,1497,3667,4067,4087,252983,389434	ADCY5,CASR,CTNS,IRS1,LYN,SMAD2,STXBP4,IYD	8/537
7_Member	GO Biological Processes	GO:1901652	response to peptide	-3.44381	-0.621296	673,846,3667,4067,4193,123041,252983	BRAF,CASR,IRS1,LYN,MDM2,SLC24A4,STXBP4	7/459
7_Member	GO Biological Processes	GO:0007167	enzyme-linked receptor protein signaling pathway	-3.40042	-0.621296	673,3084,3667,4067,4087,4774,4916,252983	BRAF,NRG1,IRS1,LYN,SMAD2,NFIA,NTRK3,STXBP4	8/616
7_Member	GO Biological Processes	GO:0051046	regulation of secretion	-3.38182	-0.621296	111,673,846,3084,3667,4067,9619,252983	ADCY5,BRAF,CASR,NRG1,IRS1,LYN,ABCG1,STXBP4	8/620
7_Member	GO Biological Processes	GO:0051223	regulation of protein transport	-3.17744	-0.476309	111,846,3667,4193,9619,9695,252983	ADCY5,CASR,IRS1,MDM2,ABCG1,EDEM1,STXBP4	7/509
7_Member	GO Biological Processes	GO:0043434	response to peptide hormone	-3.13697	-0.47174	673,3667,4067,4193,123041,252983	BRAF,IRS1,LYN,MDM2,SLC24A4,STXBP4	6/373
7_Member	GO Biological Processes	GO:0050708	regulation of protein secretion	-2.98636	-0.35898	111,846,3667,9619,252983	ADCY5,CASR,IRS1,ABCG1,STXBP4	5/266
7_Member	GO Biological Processes	GO:1903530	regulation of secretion by cell	-2.9054	-0.319487	111,673,846,3667,4067,9619,252983	ADCY5,BRAF,CASR,IRS1,LYN,ABCG1,STXBP4	7/567
7_Member	GO Biological Processes	GO:0007169	transmembrane receptor protein tyrosine kinase signaling pathway	-2.89328	-0.319487	673,3084,3667,4067,4916,252983	BRAF,NRG1,IRS1,LYN,NTRK3,STXBP4	6/416
7_Member	GO Biological Processes	GO:0050796	regulation of insulin secretion	-2.87695	-0.319487	111,846,3667,252983	ADCY5,CASR,IRS1,STXBP4	4/165
7_Member	GO Biological Processes	GO:0010827	regulation of glucose transmembrane transport	-2.82728	-0.303222	673,3667,252983	BRAF,IRS1,STXBP4	3/78
7_Member	GO Biological Processes	GO:0034762	regulation of transmembrane transport	-2.80682	-0.299196	673,2904,3667,3763,4067,57520,252983	BRAF,GRIN2B,IRS1,KCNJ6,LYN,HECW2,STXBP4	7/590
7_Member	GO Biological Processes	GO:1901653	cellular response to peptide	-2.68819	-0.261148	846,3667,4067,4193,252983	CASR,IRS1,LYN,MDM2,STXBP4	5/311
7_Member	GO Biological Processes	GO:0090276	regulation of peptide hormone secretion	-2.61252	-0.23504	111,846,3667,252983	ADCY5,CASR,IRS1,STXBP4	4/195
7_Member	GO Biological Processes	GO:0002791	regulation of peptide secretion	-2.58862	-0.225342	111,846,3667,252983	ADCY5,CASR,IRS1,STXBP4	4/198
7_Member	GO Biological Processes	GO:0090087	regulation of peptide transport	-2.5729	-0.225342	111,846,3667,252983	ADCY5,CASR,IRS1,STXBP4	4/200
7_Member	GO Biological Processes	GO:0071375	cellular response to peptide hormone stimulus	-2.24782	-0.0443664	3667,4067,4193,252983	IRS1,LYN,MDM2,STXBP4	4/247
7_Member	GO Biological Processes	GO:0046883	regulation of hormone secretion	-2.22349	-0.0344249	111,846,3667,252983	ADCY5,CASR,IRS1,STXBP4	4/251
7_Member	GO Biological Processes	GO:0009725	response to hormone	-2.16091	0	673,3667,4067,4193,6752,123041,252983	BRAF,IRS1,LYN,MDM2,SSTR2,SLC24A4,STXBP4	7/774
7_Member	GO Biological Processes	GO:0071417	cellular response to organonitrogen compound	-2.14228	0	111,846,3667,4067,4193,252983	ADCY5,CASR,IRS1,LYN,MDM2,STXBP4	6/592
7_Member	GO Biological Processes	GO:1901699	cellular response to nitrogen compound	-2.0199	0	111,846,3667,4067,4193,252983	ADCY5,CASR,IRS1,LYN,MDM2,STXBP4	6/629
8_Summary	Canonical Pathways	M13	PID ERBB4 PATHWAY	-3.74646	-0.725655	2904,3084,4193,3845,4771,252983,846,1497,4087,111,3667,26523,7468	GRIN2B,NRG1,MDM2,KRAS,NF2,STXBP4,CASR,CTNS,SMAD2,ADCY5,IRS1,AGO1,NSD2	13/-
8_Member	Canonical Pathways	M13	PID ERBB4 PATHWAY	-3.74646	-0.725655	2904,3084,4193	GRIN2B,NRG1,MDM2	3/38
8_Member	Canonical Pathways	M175	PID ERBB2 ERBB3 PATHWAY	-3.55598	-0.62448	3084,3845,4771	NRG1,KRAS,NF2	3/44
8_Member	Canonical Pathways	M236	PID DELTA NP63 PATHWAY	-3.47078	-0.621296	3084,4193,252983	NRG1,MDM2,STXBP4	3/47
8_Member	GO Biological Processes	GO:0048729	tissue morphogenesis	-2.9054	-0.319487	846,1497,3084,3845,4087,4193,4771	CASR,CTNS,NRG1,KRAS,SMAD2,MDM2,NF2	7/567
8_Member	Reactome Gene Sets	R-HSA-438064	Post NMDA receptor activation events	-2.79566	-0.298366	2904,3084,3845	GRIN2B,NRG1,KRAS	3/80
8_Member	Reactome Gene Sets	R-HSA-9006925	Intracellular signaling by second messengers	-2.69426	-0.261148	111,3084,3667,4193,26523	ADCY5,NRG1,IRS1,MDM2,AGO1	5/310
8_Member	Reactome Gene Sets	R-HSA-442755	Activation of NMDA receptors and postsynaptic events	-2.60879	-0.23504	2904,3084,3845	GRIN2B,NRG1,KRAS	3/93
8_Member	Reactome Gene Sets	R-HSA-2219528	PI3K/AKT Signaling in Cancer	-2.47147	-0.178223	3084,3667,4193	NRG1,IRS1,MDM2	3/104
8_Member	GO Biological Processes	GO:0003206	cardiac chamber morphogenesis	-2.22937	-0.0344249	3084,4193,7468	NRG1,MDM2,NSD2	3/127
8_Member	GO Biological Processes	GO:0003231	cardiac ventricle development	-2.22937	-0.0344249	3084,4193,7468	NRG1,MDM2,NSD2	3/127
8_Member	GO Biological Processes	GO:0003007	heart morphogenesis	-2.17035	-0.00572388	3084,4087,4193,7468	NRG1,SMAD2,MDM2,NSD2	4/260
8_Member	Reactome Gene Sets	R-HSA-1257604	PIP3 activates AKT signaling	-2.12488	0	3084,3667,4193,26523	NRG1,IRS1,MDM2,AGO1	4/268
9_Summary	WikiPathways	WP4312	Rett syndrome causing genes	-3.44365	-0.621296	673,2904,6792,4067,4193,4916,10251,57520,3667,444,128637,9201,80025,204851	BRAF,GRIN2B,CDKL5,LYN,MDM2,NTRK3,SPRY3,HECW2,IRS1,ASPH,TBC1D20,DCLK1,PANK2,HIPK1	14/-
9_Member	WikiPathways	WP4312	Rett syndrome causing genes	-3.44365	-0.621296	673,2904,6792	BRAF,GRIN2B,CDKL5	3/48
9_Member	GO Biological Processes	GO:0031344	regulation of cell projection organization	-3.16957	-0.476309	673,2904,4067,4193,4916,6792,10251,57520	BRAF,GRIN2B,LYN,MDM2,NTRK3,CDKL5,SPRY3,HECW2	8/668
9_Member	WikiPathways	WP2380	Brain-derived neurotrophic factor (BDNF) signaling pathway	-3.09597	-0.448472	2904,3667,4916,6792	GRIN2B,IRS1,NTRK3,CDKL5	4/144
9_Member	GO Biological Processes	GO:0010975	regulation of neuron projection development	-2.70643	-0.262265	673,4067,4193,4916,6792,57520	BRAF,LYN,MDM2,NTRK3,CDKL5,HECW2	6/453
9_Member	GO Biological Processes	GO:0120035	regulation of plasma membrane bounded cell projection organization	-2.56332	-0.225342	673,2904,4067,4193,4916,6792,57520	BRAF,GRIN2B,LYN,MDM2,NTRK3,CDKL5,HECW2	7/652
9_Member	GO Biological Processes	GO:0051345	positive regulation of hydrolase activity	-2.48138	-0.184127	444,2904,4067,4916,6792,128637	ASPH,GRIN2B,LYN,NTRK3,CDKL5,TBC1D20	6/503
9_Member	GO Biological Processes	GO:0016310	phosphorylation	-2.32155	-0.0856657	673,4067,4916,6792,9201,80025,204851	BRAF,LYN,NTRK3,CDKL5,DCLK1,PANK2,HIPK1	7/722
10_Summary	WikiPathways	WP5083	Neuroinflammation and glutamatergic signaling	-3.14166	-0.47174	2904,2911,3667,4087,4916,846,4193,55328,79068,444,1497,80025,123041	GRIN2B,GRM1,IRS1,SMAD2,NTRK3,CASR,MDM2,RNLS,FTO,ASPH,CTNS,PANK2,SLC24A4	13/-
10_Member	WikiPathways	WP5083	Neuroinflammation and glutamatergic signaling	-3.14166	-0.47174	2904,2911,3667,4087	GRIN2B,GRM1,IRS1,SMAD2	4/140
10_Member	Reactome Gene Sets	R-HSA-6794362	Protein-protein interactions at synapses	-2.70565	-0.262265	2904,2911,4916	GRIN2B,GRM1,NTRK3	3/86
10_Member	GO Biological Processes	GO:0044057	regulation of system process	-2.27117	-0.0603729	846,2904,2911,4193,55328,79068	CASR,GRIN2B,GRM1,MDM2,RNLS,FTO	6/556
10_Member	KEGG Pathway	hsa04020	Calcium signaling pathway	-2.21149	-0.0344249	444,2904,2911,4916	ASPH,GRIN2B,GRM1,NTRK3	4/253
10_Member	GO Biological Processes	GO:0042391	regulation of membrane potential	-2.05504	0	1497,2904,2911,80025,123041	CTNS,GRIN2B,GRM1,PANK2,SLC24A4	5/440
11_Summary	GO Biological Processes	GO:1902532	negative regulation of intracellular signal transduction	-2.82362	-0.303222	753,4067,4193,4771,9686,10251,123041,4916,9043,6792	LDLRAD4,LYN,MDM2,NF2,VGLL4,SPRY3,SLC24A4,NTRK3,SPAG9,CDKL5	10/-
11_Member	GO Biological Processes	GO:1902532	negative regulation of intracellular signal transduction	-2.82362	-0.303222	753,4067,4193,4771,9686,10251,123041	LDLRAD4,LYN,MDM2,NF2,VGLL4,SPRY3,SLC24A4	7/586
11_Member	GO Biological Processes	GO:0001933	negative regulation of protein phosphorylation	-2.73117	-0.262265	4067,4771,4916,9043,10251	LYN,NF2,NTRK3,SPAG9,SPRY3	5/304
11_Member	GO Biological Processes	GO:0042326	negative regulation of phosphorylation	-2.59404	-0.225342	4067,4771,4916,9043,10251	LYN,NF2,NTRK3,SPAG9,SPRY3	5/327
11_Member	GO Biological Processes	GO:0045936	negative regulation of phosphate metabolic process	-2.33642	-0.0903237	4067,4771,4916,9043,10251	LYN,NF2,NTRK3,SPAG9,SPRY3	5/376
11_Member	GO Biological Processes	GO:0010563	negative regulation of phosphorus metabolic process	-2.33159	-0.0889231	4067,4771,4916,9043,10251	LYN,NF2,NTRK3,SPAG9,SPRY3	5/377
11_Member	GO Biological Processes	GO:0022604	regulation of cell morphogenesis	-2.24782	-0.0443664	4771,6792,9043,10251	NF2,CDKL5,SPAG9,SPRY3	4/247
11_Member	GO Biological Processes	GO:0043405	regulation of MAP kinase activity	-2.09617	0	4067,4916,10251	LYN,NTRK3,SPRY3	3/142
11_Member	GO Biological Processes	GO:0031400	negative regulation of protein modification process	-2.06708	0	4067,4771,4916,9043,10251	LYN,NF2,NTRK3,SPAG9,SPRY3	5/437
12_Summary	GO Biological Processes	GO:0060322	head development	-2.79358	-0.298366	444,673,1497,2904,3845,4771,6752,9201	ASPH,BRAF,CTNS,GRIN2B,KRAS,NF2,SSTR2,DCLK1	8/-
12_Member	GO Biological Processes	GO:0060322	head development	-2.79358	-0.298366	444,673,1497,2904,3845,4771,6752,9201	ASPH,BRAF,CTNS,GRIN2B,KRAS,NF2,SSTR2,DCLK1	8/765
13_Summary	GO Biological Processes	GO:0009451	RNA modification	-2.75628	-0.273134	10436,25821,79068,79828,7468,4087,26523	EMG1,MTO1,FTO,METTL8,NSD2,SMAD2,AGO1	7/-
13_Member	GO Biological Processes	GO:0009451	RNA modification	-2.75628	-0.273134	10436,25821,79068,79828	EMG1,MTO1,FTO,METTL8	4/178
13_Member	GO Biological Processes	GO:0001510	RNA methylation	-2.62214	-0.23504	10436,25821,79828	EMG1,MTO1,METTL8	3/92
13_Member	GO Biological Processes	GO:0032259	methylation	-2.21149	-0.0344249	7468,10436,25821,79828	NSD2,EMG1,MTO1,METTL8	4/253
13_Member	GO Biological Processes	GO:0034470	ncRNA processing	-2.13307	0	4087,10436,25821,26523,79828	SMAD2,EMG1,MTO1,AGO1,METTL8	5/421
14_Summary	GO Biological Processes	GO:0062012	regulation of small molecule metabolic process	-2.5379	-0.225342	3667,4200,9619,26137,80025,4193,9686,25820,79068	IRS1,ME2,ABCG1,ZBTB20,PANK2,MDM2,VGLL4,ARIH1,FTO	9/-
14_Member	GO Biological Processes	GO:0062012	regulation of small molecule metabolic process	-2.5379	-0.225342	3667,4200,9619,26137,80025	IRS1,ME2,ABCG1,ZBTB20,PANK2	5/337
14_Member	GO Biological Processes	GO:0009896	positive regulation of catabolic process	-2.14573	0	3667,4193,9686,25820,26137,79068	IRS1,MDM2,VGLL4,ARIH1,ZBTB20,FTO	6/591
14_Member	GO Biological Processes	GO:0045834	positive regulation of lipid metabolic process	-2.0714	0	3667,9619,26137	IRS1,ABCG1,ZBTB20	3/145
14_Member	GO Biological Processes	GO:0062013	positive regulation of small molecule metabolic process	-2.05521	0	3667,9619,26137	IRS1,ABCG1,ZBTB20	3/147
15_Summary	Reactome Gene Sets	R-HSA-397014	Muscle contraction	-2.53439	-0.225342	217,444,7170,204851,3658,4200,80025	ALDH2,ASPH,TPM3,HIPK1,IREB2,ME2,PANK2	7/-
15_Member	Reactome Gene Sets	R-HSA-397014	Muscle contraction	-2.53439	-0.225342	217,444,7170,204851	ALDH2,ASPH,TPM3,HIPK1	4/205
15_Member	GO Biological Processes	GO:0006091	generation of precursor metabolites and energy	-2.18461	-0.0156261	217,444,3658,4200,80025	ALDH2,ASPH,IREB2,ME2,PANK2	5/409
16_Summary	GO Biological Processes	GO:0045862	positive regulation of proteolysis	-2.46779	-0.178223	444,2904,4067,4193,25820	ASPH,GRIN2B,LYN,MDM2,ARIH1	5/-
16_Member	GO Biological Processes	GO:0045862	positive regulation of proteolysis	-2.46779	-0.178223	444,2904,4067,4193,25820	ASPH,GRIN2B,LYN,MDM2,ARIH1	5/350
17_Summary	Reactome Gene Sets	R-HSA-382551	Transport of small molecules	-2.30224	-0.0763478	111,444,1497,3658,9197,9619,123041	ADCY5,ASPH,CTNS,IREB2,SLC33A1,ABCG1,SLC24A4	7/-
17_Member	Reactome Gene Sets	R-HSA-382551	Transport of small molecules	-2.30224	-0.0763478	111,444,1497,3658,9197,9619,123041	ADCY5,ASPH,CTNS,IREB2,SLC33A1,ABCG1,SLC24A4	7/728
18_Summary	GO Biological Processes	GO:0006974	DNA damage response	-2.2179	-0.0344249	4067,4193,7468,55339,79068,204851,252983	LYN,MDM2,NSD2,WDR33,FTO,HIPK1,STXBP4	7/-
18_Member	GO Biological Processes	GO:0006974	DNA damage response	-2.2179	-0.0344249	4067,4193,7468,55339,79068,204851,252983	LYN,MDM2,NSD2,WDR33,FTO,HIPK1,STXBP4	7/755
19_Summary	GO Biological Processes	GO:0035107	appendage morphogenesis	-2.06328	0	444,4774,64327	ASPH,NFIA,LMBR1	3/-
19_Member	GO Biological Processes	GO:0035107	appendage morphogenesis	-2.06328	0	444,4774,64327	ASPH,NFIA,LMBR1	3/146
19_Member	GO Biological Processes	GO:0035108	limb morphogenesis	-2.06328	0	444,4774,64327	ASPH,NFIA,LMBR1	3/146
